# Supplementary material
Source: PubMed Central journal article supplement (PMC10233396)
Supplement: izac280_suppl_supplementary_material.pdf [file izac280_suppl_supplementary_material.pdf]

**FIGURE S1:** ELS does not impact colonic Foxp3-, IL-10-, and IFN $\gamma$ -, and IL-17-expressing CD4 T cells during colitis.

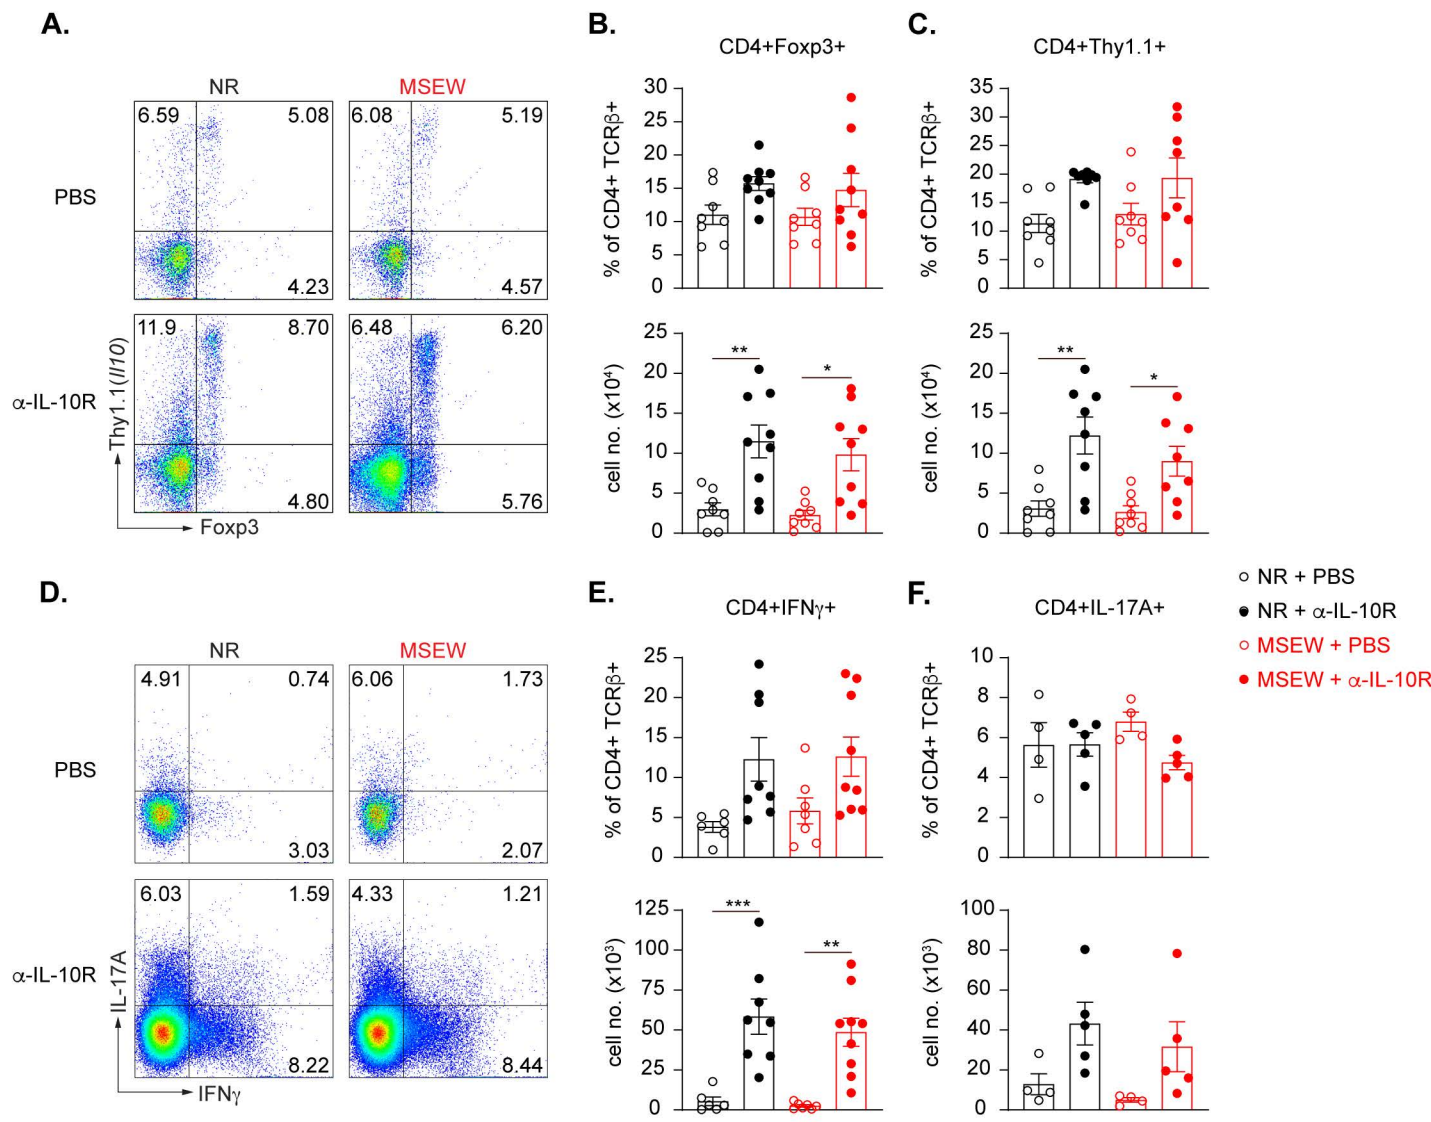

**FIGURE S2:** Colitis in MSEW mice does not significantly impact *Il6*, *Il1b*, or *Nos2* transcript levels.

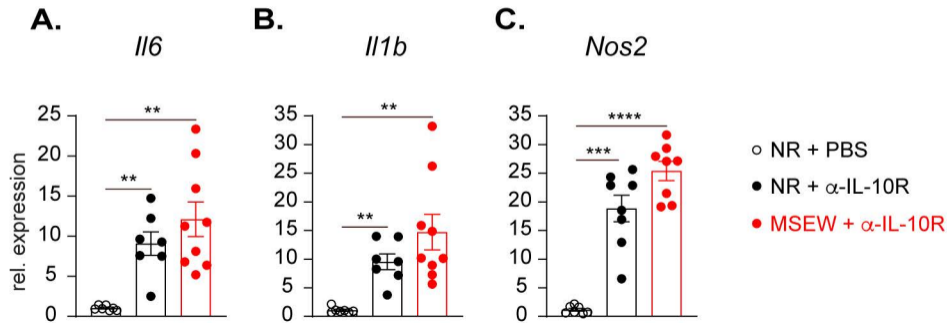

**FIGURE S3:** Elevated induction of TNF by non-epithelial cells in colitic MSEW mice relative to NR mice.

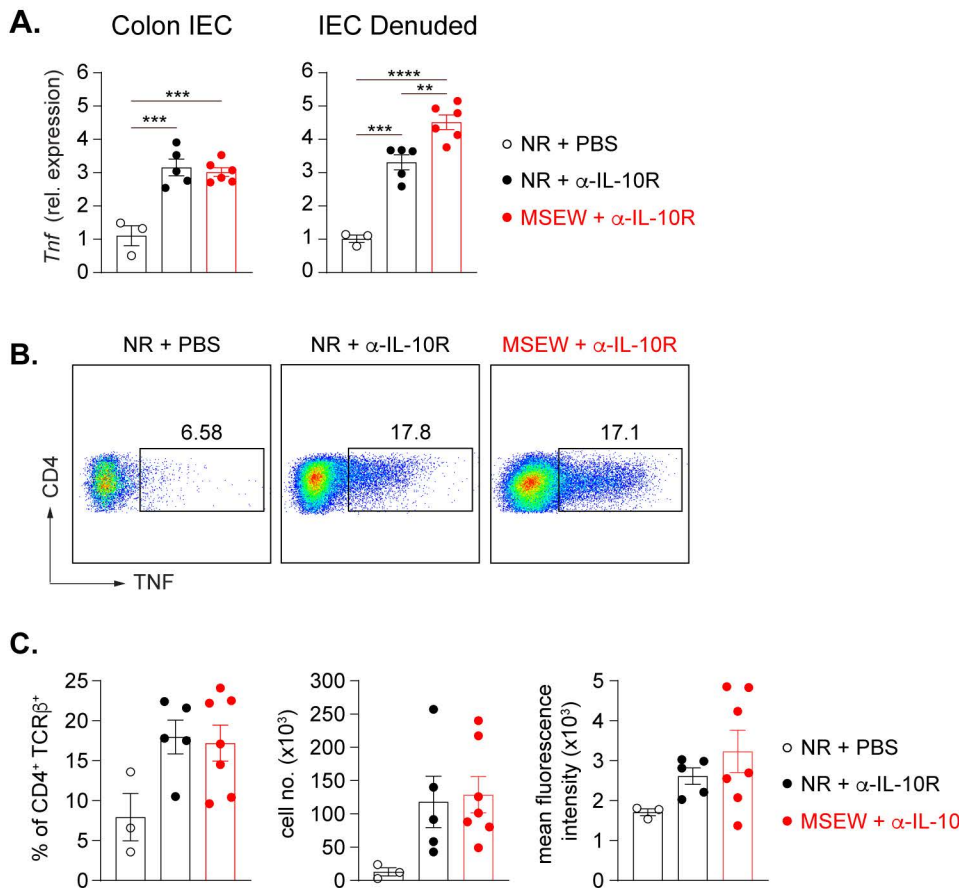

**FIGURE S4:** Colitis in Dex mice does not significantly impact *Il6* or *Il1b* induction or responsiveness.

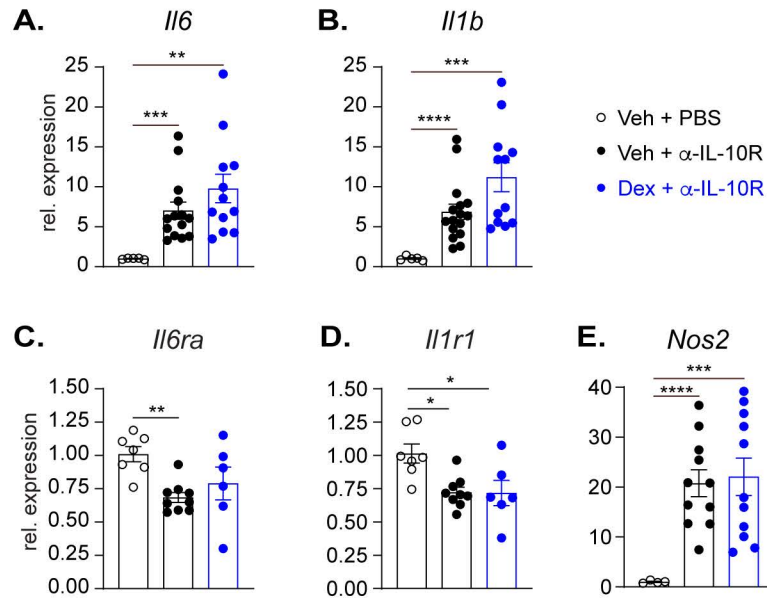

**TABLE S1:** Primers used in qRT-PCR experiments.

| Gene            | Forward                        | Reverse                        |
|-----------------|--------------------------------|--------------------------------|
| <i>Cyp11a1</i>  | 5'-CTGCCTGGGATGTGATTTTC-3'     | 5'-ACACCAGGGTACTGGCTGAA-3'     |
| <i>Il1b</i>     | 5'-GCAACTGTTCCTGAACTCAACT-3'   | 5'-ATCTTTTGGGGTCCGTCAACT-3'    |
| <i>Il1r1</i>    | 5'-AGCCAGTTTTATCGCTATCCG-3'    | 5'-ATAAAGCCCCCGATGAGGTA-3'     |
| <i>Il6</i>      | 5'-CACTTCACAAGTCGGAGGCT-3'     | 5'-TTCTGCAAGTGCATCATCGT-3'     |
| <i>Il6ra</i>    | 5'-AAGACTCTGCCAACCACGAG-3'     | 5'-CAAGCTTCCTCCAGCTACCA-3'     |
| <i>Nos2</i>     | 5'-TGCATGGACCAGTATAAGGCAAGC-3' | 5'-GCTTCTGGTCGATGTCATGAGCAA-3' |
| <i>Nr3c1</i>    | 5'-GTCAAGGTTTCTGCGTCTTC-3'     | 5'-AAGGTGCT TTGGTCTGTGG-3'     |
| <i>Nr5a2</i>    | 5'-TTGAGTGGGCCAGGAGTAGT-3'     | 5'-ACGCGACTTCTGTGTGTGAG-3'     |
| <i>Tbp</i>      | 5'-ACCGTGAATCTTGGCTGTAAAC-3'   | 5'-GCAGCAAATCGCTTGGGATTA-3'    |
| <i>Tnf</i>      | 5'-CCCTCACACTCAGATCATCTTCT-3'  | 5'-GCTACGACGTGGGCTACAG-3'      |
| <i>Tnfrsf1a</i> | 5'-CCGGGAGAAGAGGGATAGCTT-3'    | 5'-TCGGACAGTCACTCACCAAGT-3'    |
| <i>Tnfrsf1b</i> | 5'-CAGGAAGGCTCAGATGTGCT-3'     | 5'-CATGCTTGCCTCACAGTCC-3'      |
